# Supplementary material for: Double-diffusion-based synthesis of BiVO4 mesoporous single crystals with enhanced photocatalytic activity for oxygen evolution
Source: Royal Society of Chemistry journal article supplement (doi:10.1039/c6cc02737g), 2016-01-01
Supplement: c6cc02737g1.pdf [file c6cc02737g1.pdf]

## Support Information

# Double-Diffusion-Based Synthesis of BiVO<sub>4</sub> Mesoporous Single Crystals with Enhanced Photocatalytic Activity for Oxygen Evolution

Qiangfang Wu, Shenyuan Bao, Baozhu Tian,\* Yifei Xiao, Jinlong Zhang\*

Key Laboratory for Advanced Materials and Institute of Fine Chemicals, East China University of Science and Technology, 130 Meilong Road, Shanghai, 200237, P.R. China.

Corresponding author: baozhutian@ecust.edu.cn; jlzhang@ecust.edu.cn

### ■ Synthetic Procedures

#### (1) Preparation of silica template

Silica spheres with diameter of 50 nm were synthesized by the Stöber method. The detailed procedure is as follows: 167.2 mL of absolute ethanol, 28.8 mL of water, and 4.0 mL of ammonia water (28 wt.%) were mixed in a breaker to obtain Solution A. Similarly, Solution B was obtained by mixing 18.0 mL of tetraethoxysilane (TEOS) and 182.0 mL of absolute ethanol. Under magnetic stirring, Solution B was added to Solution A and reacted at room temperature for 24 h to obtain silica colloids. Finally, the close-packed silica template was synthesized by centrifugation at 12000 rpm for 1 h and sintering at 500 °C for 30 min.

#### (2) Synthesis of acidified BiVO<sub>4</sub> precursor solution immersed SiO<sub>2</sub> template.

Firstly, 0.97 g of Bi(NO<sub>3</sub>)<sub>3</sub>•5H<sub>2</sub>O (2 mmol) and 0.234 g of NH<sub>4</sub>VO<sub>3</sub> (2 mmol) were dissolved in 7.5 mL of nitric acid solution (2 M) to obtain a bright yellow solution. Then, the as-prepared silica template was immersed into the above solution and the system was vacuumed by a pump to extract the gas in silica template and make precursor solution enter into the intervals of silica template. After immersing for 2 h, the silica template containing BiVO<sub>4</sub> precursor solution was taken out for next synthetic process.

#### (3) Synthesis of BiVO<sub>4</sub> MSCs.

In a typical synthetic procedure, 17.46g (36 mmol) of Bi(NO<sub>3</sub>)<sub>3</sub>•5H<sub>2</sub>O and 4.212 g (36 mmol) of NH<sub>4</sub>VO<sub>3</sub> were dissolved in 300 mL of nitric acid solution (2 M). The pH value of the above solution was

adjusted to 2.0 with ammonia water (28 wt.%). In this process, the clarified yellow solution was turned to orange suspension. After aged for 2 h, the obtained precipitate was collected and transferred into an 80 mL autoclave containing 2.0 g BiVO<sub>4</sub> precursor solution immersed silica template, followed by hydrothermal treatment at 240 °C for 24 h. The obtained product was washed by ultrapure water and further selectively etched with NaOH solution (0.5 M) at 80 °C for 3 h to remove SiO<sub>2</sub> template. Finally, the BiVO<sub>4</sub> MSCs were obtained by centrifugation and washed several times with ultrapure water and dried at 70 °C for 24 h.

#### **(4) Synthesis of BiVO<sub>4</sub> bulk single crystals (BSCs).**

BiVO<sub>4</sub> bulk single crystals (BSCs) was fabricated by a modified hydrothermal method, according to the previous literature.<sup>1</sup>

(1) Li, R. G.; Han, H. X.; Zhang, F. X.; Wang D. E.; Li, C. *Energy Environ. Sci.* **2014**, 7, 1369.

#### **(5) Synthesis of BiVO<sub>4</sub> nanoparticles (NPs)**

Firstly, 17.46 g (36 mmol) of Bi(NO<sub>3</sub>)<sub>3</sub>•5H<sub>2</sub>O and 4.212 g (36 mmol) of NH<sub>4</sub>VO<sub>3</sub> were dissolved in 300 mL of nitric acid solution (2 M). The pH value of the above solution was adjusted to 2.0 with ammonia water (28 wt.%). In this process, the clarified yellow solution was turned to orange suspension. After aged for 2 h, the precipitate was collected by centrifugation. Then, the production was washed with ultrapure water for 3 times and dried at 70 °C for 24 h.

### **■ Characterization**

The morphologies of the synthesized BiVO<sub>4</sub> samples were characterized by field emission scanning electron microscope (EFSEM, NOVA Nano SEM450) and transmission electron microscope (TEM, JEM2100). X-ray diffraction measurements were carried on a X-ray diffractometer (Rigaku D/max 2550 VB/PC, Cu Ka radiation,  $\lambda = 1.5406 \text{ \AA}$ ). The surface electric status was studied on a Perkin-Elmer PHI 5000 X-ray photoelectron spectroscope. The N<sub>2</sub> adsorption-desorption isotherm was measured at 77 K using a Micromeritics ASAP2020 instrument. The chemical states were identified by X-ray photoelectron spectroscopy (XPS, Perkin-Elmer PHI 5000). UV-vis diffuse reflectance spectra (DRS) were measured with a SHIMADZU UV-2450 spectroscopy equipped with an integrating sphere assembly, using BaSO<sub>4</sub> as the reference material. Raman spectra were taken by a Via Reflex Raman spectrometer. Photoluminescence emission spectra were measured with a SHIMADZU RF5301PC by using 380 nm line of Xe lamp as excitation source at room temperature.

The electrochemical analysis was carried on a Zahner electrochemical work station by a standard three-electrode system consisting of a working electrode (FTO glass with 0.2 mg as-prepared samples with an active area of 1.5 cm<sup>2</sup>), a Pt wire as the counter electrode, and a saturated calomel electrode as the reference electrode. Transient photocurrent responses of different samples were carried out in 0.5 M Na<sub>2</sub>SO<sub>4</sub> aqueous solution under 300 W Xe lamp with 420 nm cut-off filter. The electrochemical impedance spectroscopy was measured in 2.0 mM K<sub>3</sub>[Fe(CN)<sub>6</sub>], 2.0 mM K<sub>4</sub>[Fe(CN)<sub>6</sub>] and 0.5 M KCl mixed aqueous

solution.

## ■ Photocatalytic O<sub>2</sub> Evolution Measurement

The photocatalytic O<sub>2</sub> evolution reactions were carried out in a closed gas circulation system. Typically, 0.1 g photocatalyst was dispersed in 80 mL NaIO<sub>3</sub> aqueous solution (0.02 M) in a Pyrex reactor. The reactor was thoroughly degassed to drive off the air inside and irradiated by a 300 W Xe Lamp (Au-Light) with optical cutoff filter (420 nm). The amount of evolved O<sub>2</sub> was determined by an online gas chromatograph (INESA GC122, TCD, Ar carrier).

## ■ Figures

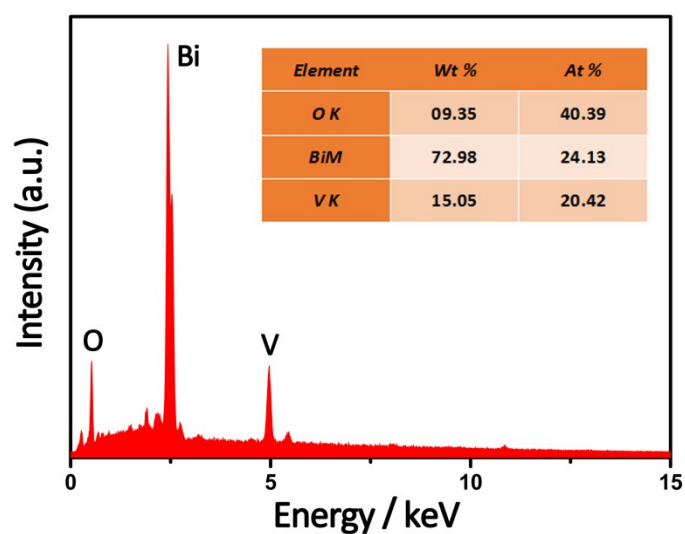

Fig. S1. Energy dispersive spectra (EDS) of BiVO<sub>4</sub> MSCs.

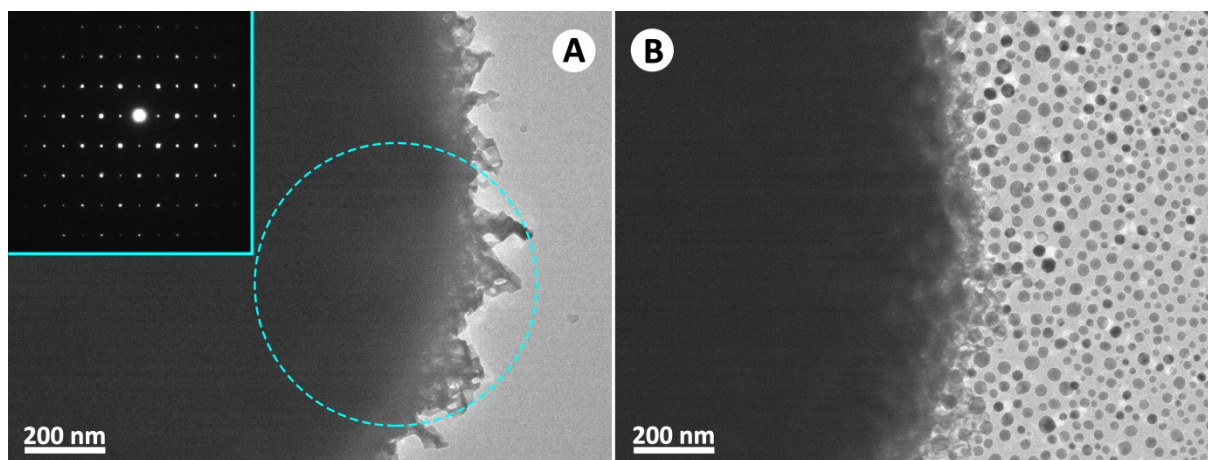

**Fig. S2.** TEM images of as-prepared  $\text{BiVO}_4$  MSCs (A) at lower current density; (B) at higher current density. The insert of Fig. S2A is the SAED pattern with an enlarged selected area (the diameter of the circle is 500 nm).

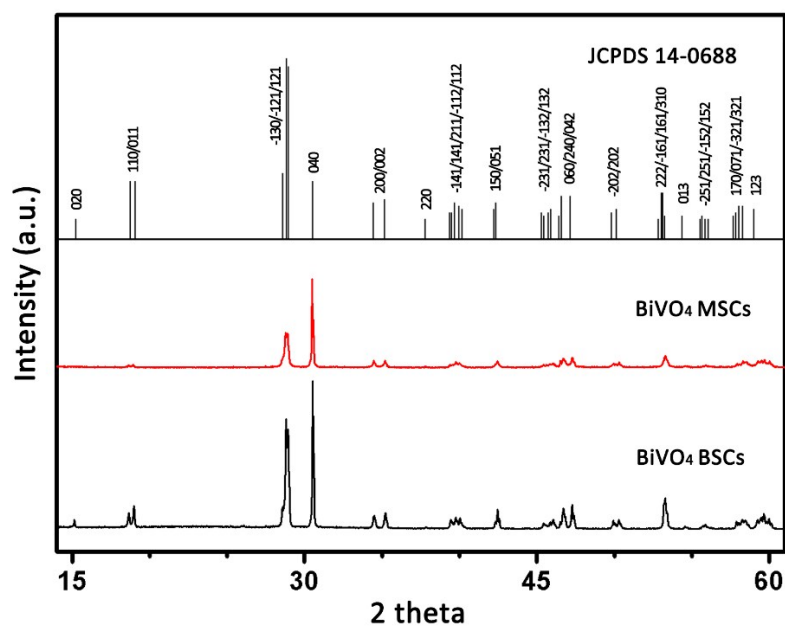

**Fig. S3.** XRD patterns of  $\text{BiVO}_4$  MSCs (red line) and  $\text{BiVO}_4$  BSCs (black line).

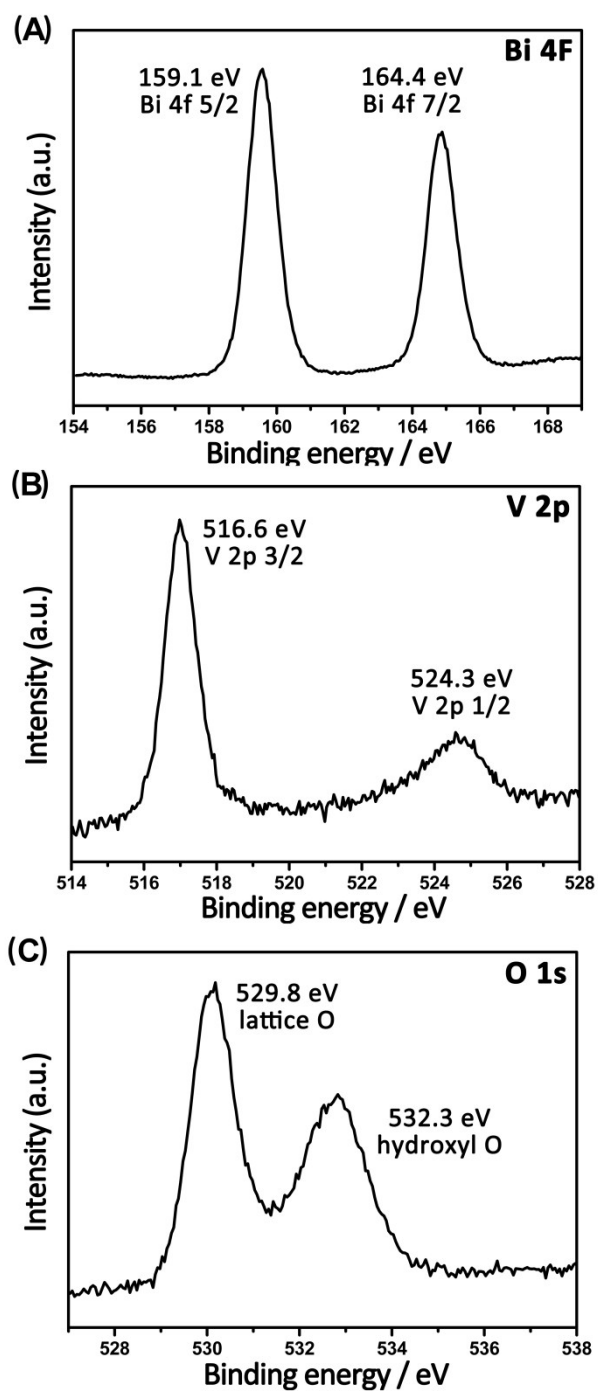

Fig. S4. XPS spectra of BiVO<sub>4</sub> MSCs: (A) Bi 4f; (B) V 2p; (C) O 1s.

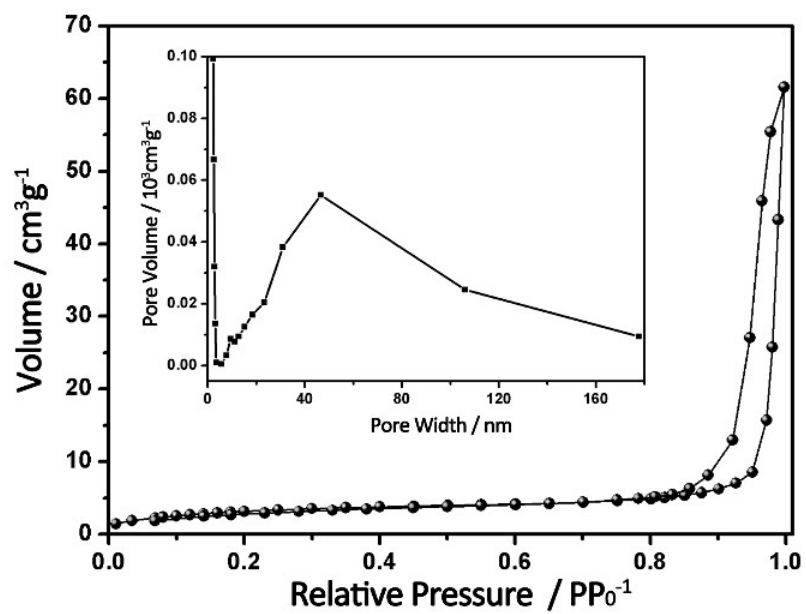

**Fig. S5.** Nitrogen adsorption–desorption isotherm and the corresponding pore size distributions (inset) of BiVO<sub>4</sub> MSCs.

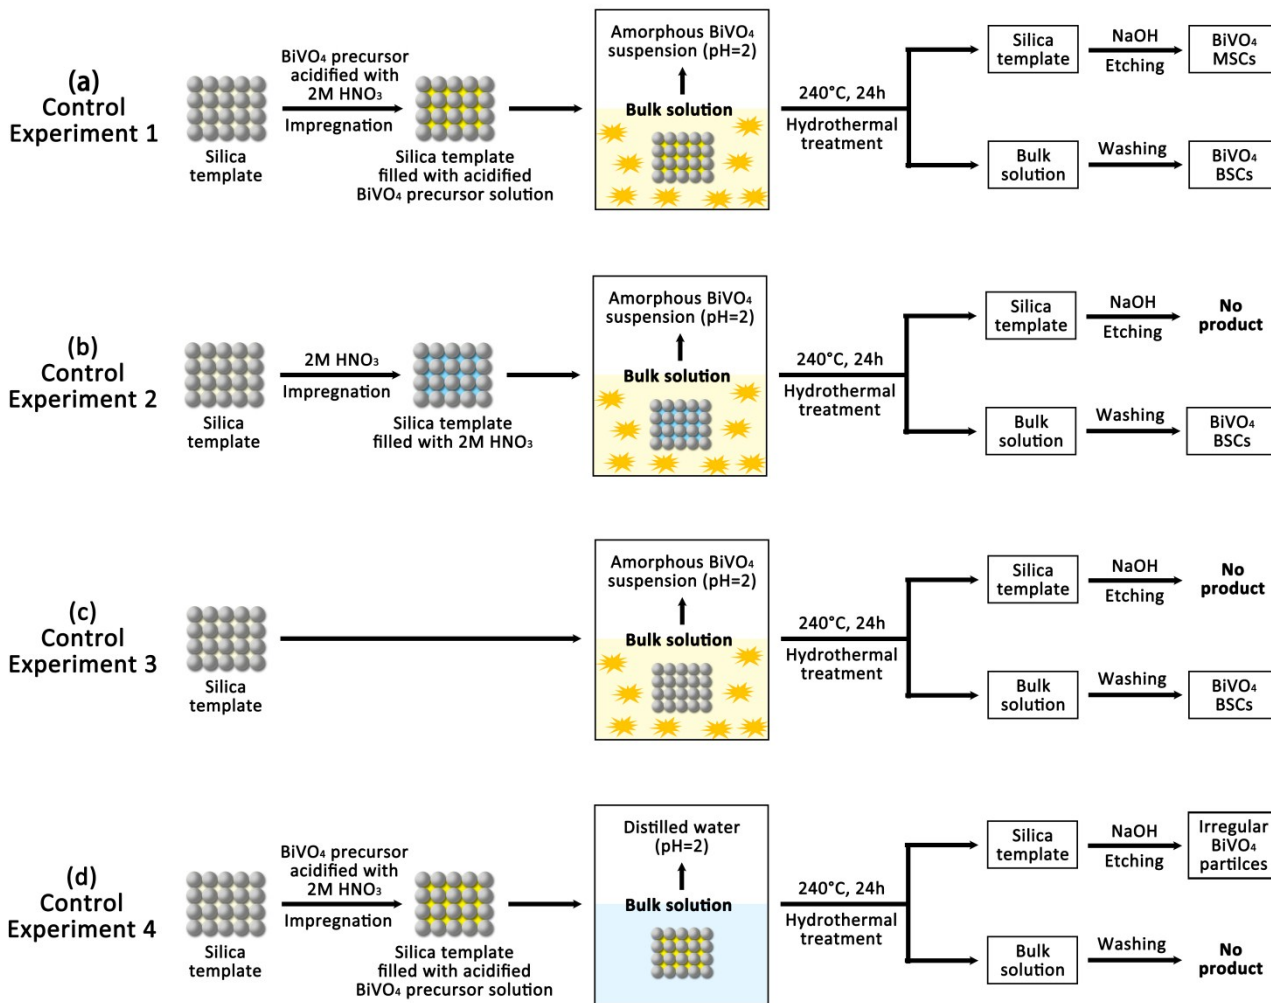

**Fig. S6.** Control experiments carried out under different conditions to explore the formation mechanism of  $\text{BiVO}_4$  MSCs.

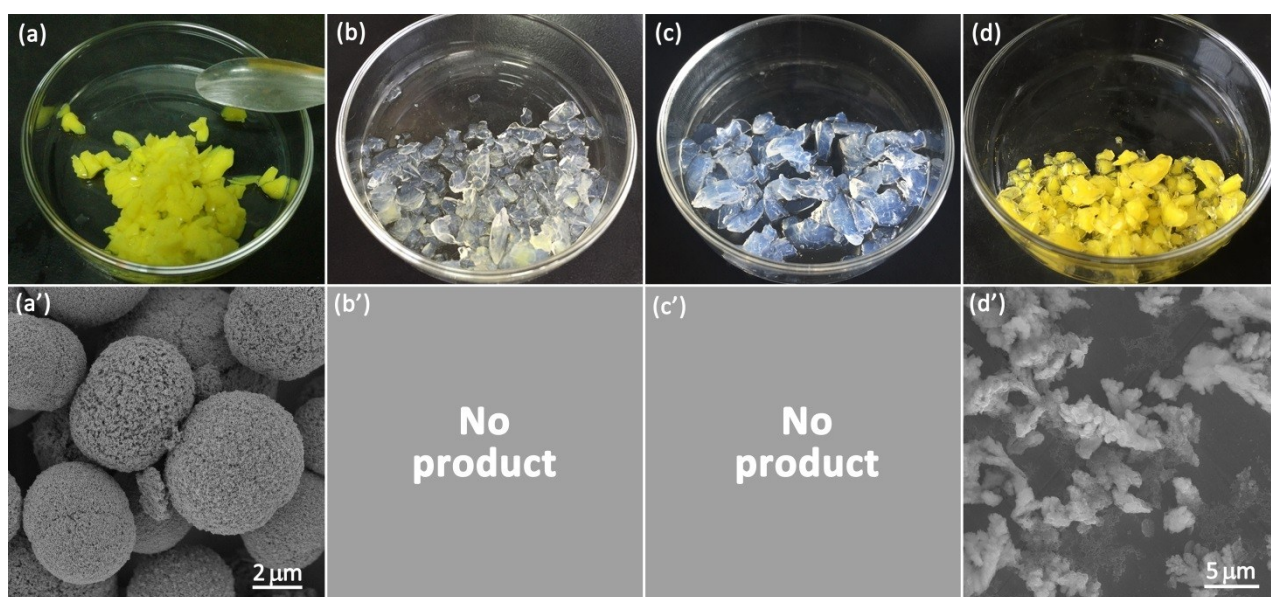

**Fig. S7.** Photos of silica templates obtained in different control experiments (after hydrothermal treatment): (a) Control experiment 1, (b) Control experiment 2, (c) Control experiment 3, and (d) Control experiment 4. FE-SEM images of the products obtained in different control experiments: (a') Control experiment 1 and (d') Control experiment 4.

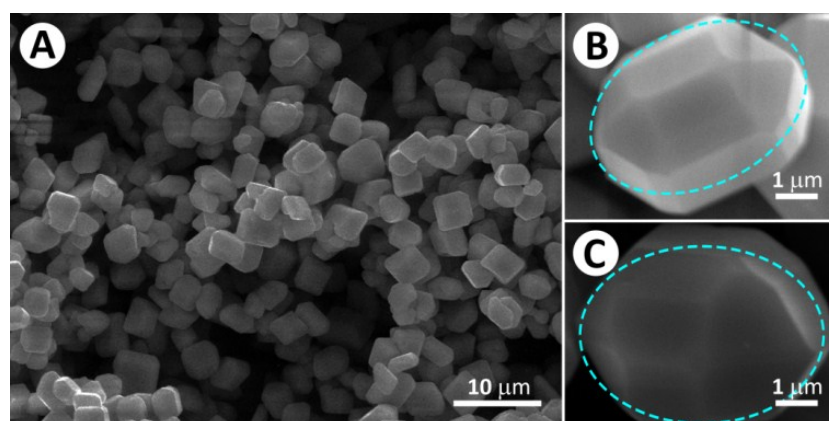

**Fig. S8.** SEM images of the  $\text{BiVO}_4$  single crystals prepared in the absence of silica template



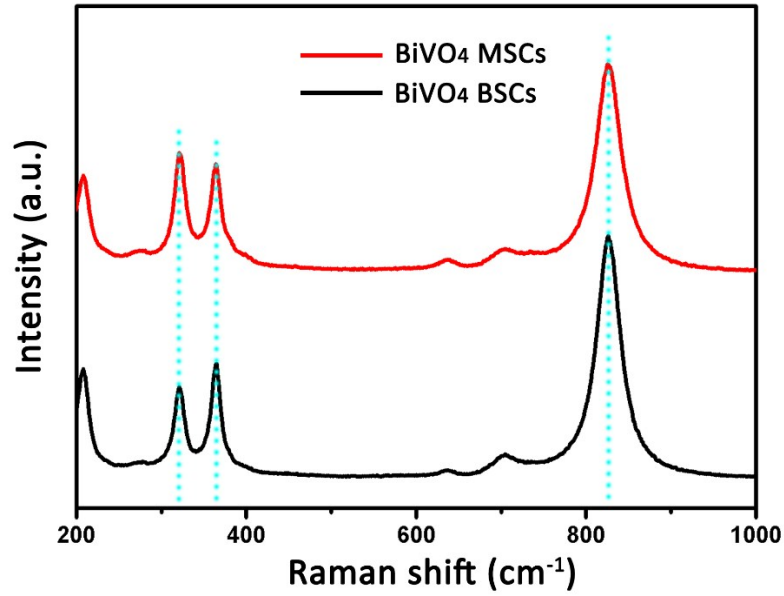

**Fig. S9.** Raman spectra of BiVO<sub>4</sub> MSCs (red line) and BiVO<sub>4</sub> BSCs (black line).

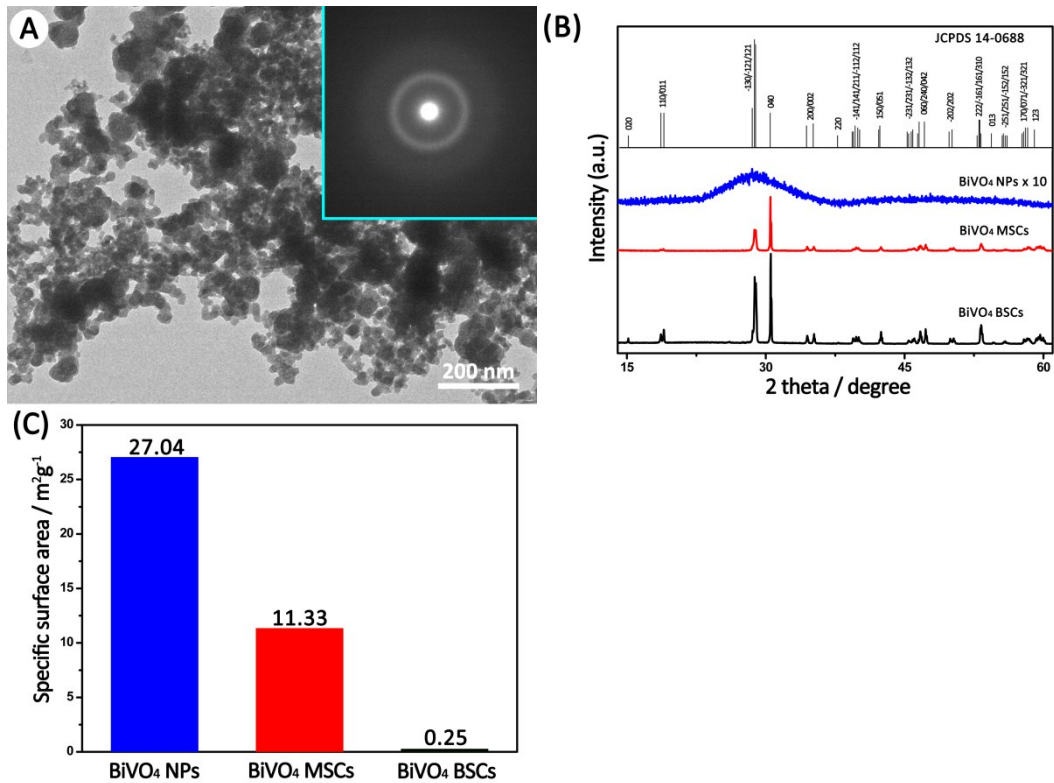

**Fig. S10.** (A) TEM image of as prepared BiVO<sub>4</sub> nanoparticles (NPs) and insert is the corresponding SAED pattern. (B) XRD patterns of as prepared BiVO<sub>4</sub> MSCs, BSCs and NPs. (C) Specific surface areas ( $S_{\text{BET}}$ ) of BiVO<sub>4</sub> MSCs, BSCs and NPs.
